# Supplementary material
Source: Springer Nature journal article supplement (https://www.springermedizin.de/resource/supplementary/12872_2014_755_MOESM1_ESM.pdf/9430426)
Supplement: MOESM1 [file 9430426]

09191120130216

POLICLINICO CATANIA

S8-3/ecocordio PEDI

TIS1.7 MI 0.7

POLICLINICO CATANIA

Study: 20130216\_111909

Series: 1

Instance: 2

FR 61Hz  
8.1cm2D  
70%  
C 45  
P Off  
RisRight  
ventricle
 ✦ Dist 0.439 cm  
 :: Dist 0.154 cm  
 ⦿ Dist 0.165 cm  
 || Dist 0.147 cm

M3

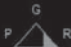Aortic  
valve

 Left main  
coronary artery
L 165  
W 235

\*\*\*bpm

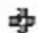

External diameter

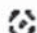

Superior thickening

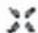

Internal diameter

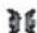

Inferior thickening
